# Supplementary material
Source: PubMed Central journal article supplement (PMC5097029)
Supplement: NIHMS824220-supplement-2.pdf [file NIHMS824220-supplement-2.pdf]

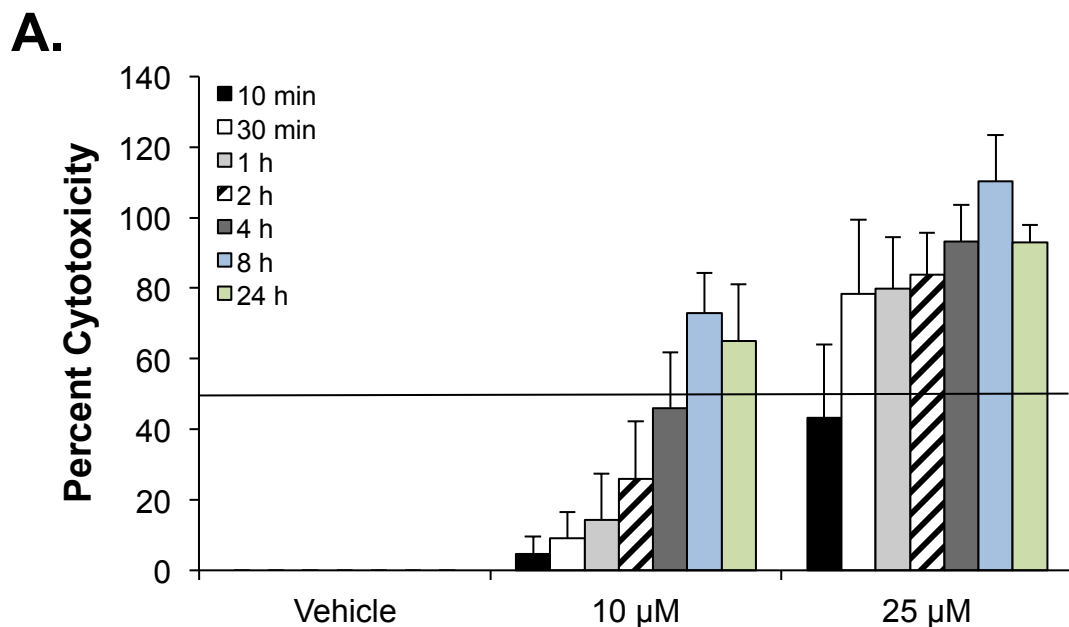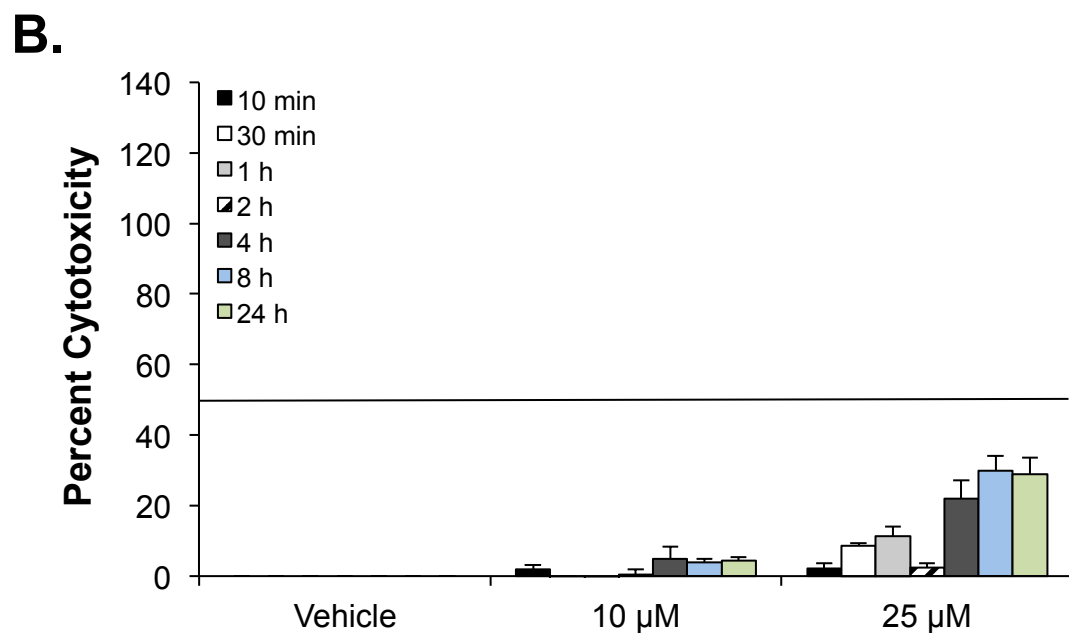

**Figure 2. Mastoparan-induced cell death peaks by 8 h in cancer cells and normal cells.** (A) Jurkat T leukemia cells or (B) normal PBMCs were cultured in the presence or absence of Mastoparan for the indicated periods of time. Percent cytotoxicity was calculated by LDH-release assay. Data shown represent the mean of 3 independent experiments  $\pm$  SEM.
