# Supplementary material
Source: PubMed Central journal article supplement (PMC5097029)
Supplement: NIHMS824220-supplement-3.pdf [file NIHMS824220-supplement-3.pdf]

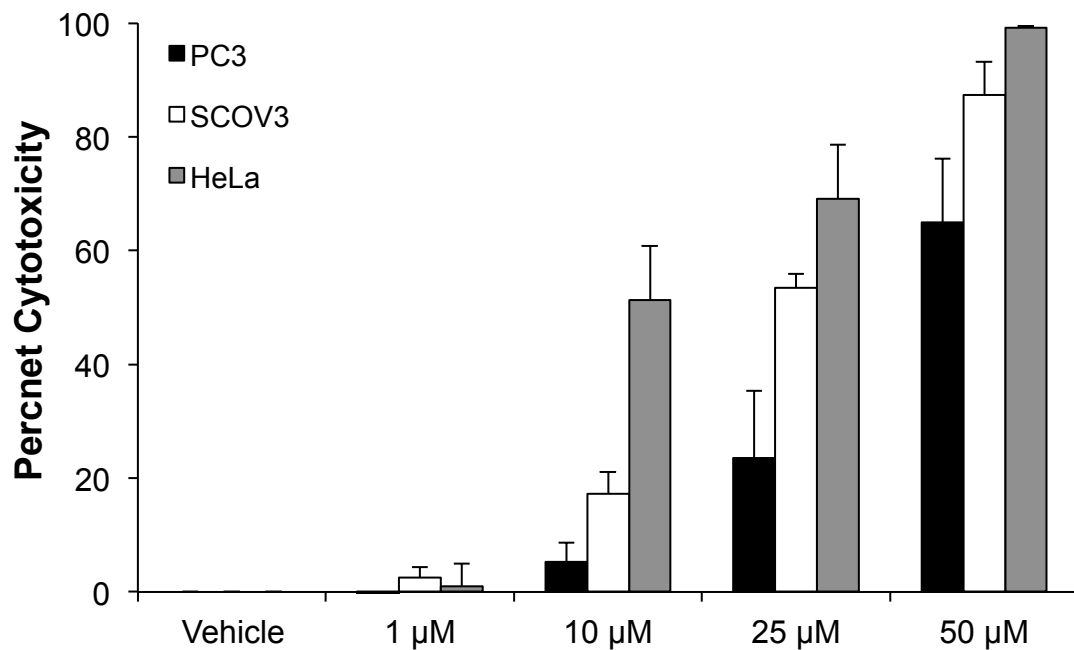

**Supplementary Figure 1. Mastoparan is toxic to prostate, ovarian, and cervical cancer cells.** PC3 prostate cancer cells (black), SCOV3 ovarian cancer cells (white), and HeLa cervical cancer cells (grey) were cultured in the presence or absence of the indicated concentrations of Mastoparan. Percent cytotoxicity was determined by MTT after 24 h. Data shown represents the mean of 3 independent experiments  $\pm$  SEM.
