# Supplementary material
Source: PubMed Central journal article supplement (PMC5097029)
Supplement: NIHMS824220-supplement-5.pdf [file NIHMS824220-supplement-5.pdf]

**Supplementary Table 1: Cytotoxic activity of peptide library toward MDA-MB-231 breast cancer cells**

| Peptide             | MDA-MB-231 <sup>a</sup> |            |            |
|---------------------|-------------------------|------------|------------|
|                     | Percent Cytotoxicity    |            |            |
|                     | 12.5 $\mu$ M            | 25 $\mu$ M | 50 $\mu$ M |
| 1018                | 2                       | 0          | 18         |
| 2001                | 1                       | 17         | 57         |
| 2002                | 0                       | 0          | 13         |
| 2003                | 10                      | 22         | 64         |
| 2004                | 13                      | 22         | 76         |
| 2005                | 2                       | 10         | 32         |
| 2006                | 3                       | 8          | 75         |
| 2007                | 0                       | 0          | 47         |
| 2008                | 0                       | 9          | 38         |
| 1002                | 0                       | 2          | 8          |
| 2009                | 2                       | 7          | 22         |
| 2010                | 0                       | 0          | 0          |
| HH2                 | 0                       | 0          | 5          |
| 2011                | 0                       | 5          | 11         |
| 2012                | 4                       | 25         | 61         |
| 2013                | 0                       | 0          | 0          |
| V681                | 97                      | 98         | 96         |
| NRC-03 <sup>b</sup> | 22                      | 49         | 87         |
| NRC-07 <sup>b</sup> | 35                      | 59         | 94         |
| MPLfcinB6           | 0                       | 2          | 7          |
| 1020                | 0                       | 0          | 7          |
| 1020RK              | 0                       | 0          | 5          |
| Guavanin            | 1                       | 0          | 1          |
| Pa-MAP1.9           | 12                      | 15         | 18         |
| Mastoparan          | 31                      | 55         | 93         |

<sup>a</sup>Peptide-mediated cytotoxicity was assessed after 24 h by MTT assay. Data shown represent the mean of 3 independent experiments. Red denotes significant anti-cancer activities.

<sup>b</sup>NRC-03 and NRC-07 included as a positive control (Hilchie *et al.*, 2011).

**Supplementary Table 2: Cytotoxic activity of peptide library toward MDA-MB-468 breast cancer cells**

| Peptide             | MDA-MB-468 <sup>a</sup> |            |            |
|---------------------|-------------------------|------------|------------|
|                     | Percent Cytotoxicity    |            |            |
|                     | 12.5 $\mu$ M            | 25 $\mu$ M | 50 $\mu$ M |
| 1018                | 20                      | 32         | 49         |
| 2001                | 4                       | 21         | 64         |
| 2002                | 0                       | 2          | 29         |
| 2003                | 7                       | 18         | 67         |
| 2004                | 7                       | 26         | 76         |
| 2005                | 7                       | 16         | 62         |
| 2006                | 7                       | 41         | 81         |
| 2007                | 15                      | 42         | 84         |
| 2008                | 17                      | 46         | 79         |
| 1002                | 4                       | 9          | 44         |
| 2009                | 5                       | 28         | 60         |
| 2010                | 1                       | 5          | 3          |
| HH2                 | 5                       | 8          | 15         |
| 2011                | 1                       | 4          | 11         |
| 2012                | 12                      | 32         | 64         |
| 2013                | 9                       | 11         | 18         |
| V681                | 84                      | 97         | 97         |
| NRC-03 <sup>b</sup> | 24                      | 52         | 80         |
| NRC-07 <sup>b</sup> | 38                      | 64         | 83         |
| MPLfcinB6           | 0                       | 9          | 32         |
| 1020                | 0                       | 1          | 22         |
| 1020RK              | 0                       | 7          | 23         |
| Guavanin            | 18                      | 15         | 16         |
| Pa-MAP1.9           | 19                      | 22         | 32         |
| Mastoparan          | 38                      | 49         | 84         |

<sup>a</sup>Peptide-mediated cytotoxicity was assessed after 24 h by MTT assay. Data shown represent the mean of 3 independent experiments. Red denotes significant anti-cancer activities.

<sup>b</sup>NRC-03 and NRC-07 included as a positive control (Hilchie *et al.*, 2011).

**Supplementary Table 3: Hemolytic activity of anti-cancer peptides**

|                     | <b>Human Erythrocytes<sup>a</sup></b> |            |            |
|---------------------|---------------------------------------|------------|------------|
|                     | Percent Hemolysis                     |            |            |
|                     | 12.5 $\mu$ M                          | 25 $\mu$ M | 50 $\mu$ M |
| 2001                | 1                                     | 1          | 3          |
| 2003                | 0                                     | 0          | 0          |
| 2004                | 1                                     | 2          | 2          |
| 2005                | 5                                     | 9          | 15         |
| 2006                | 3                                     | 4          | 4          |
| 2007                | 1                                     | 1          | 1          |
| 2008                | 0                                     | 1          | 1          |
| 2009                | 1                                     | 2          | 6          |
| 2012                | 1                                     | 2          | 4          |
| V681                | 31                                    | 54         | 84         |
| NRC-03 <sup>b</sup> | 2                                     | 3          | 4          |
| NRC-07 <sup>b</sup> | 4                                     | 7          | 9          |
| Mastoparan          | 4                                     | 2          | 3          |

<sup>a</sup>Peptide-mediated hemolytic activity was assessed after 4 h by hemolysis assay. Data shown represent the mean of 3 independent experiments. Red denotes significant hemolytic activities.

<sup>b</sup>NRC-03 and NRC-07 included as a negative control for hemolysis (Hilchie *et al.*, 2011).
